# Supplementary material
Source: MDPI journal article supplement (https://www.mdpi.com/2073-4344/11/11/1408)
Supplement: s1 [file s1]

Supplementary Material

# Halide-Doping Effect of Strontium Cobalt Oxide Electrocatalyst and the Induced Activity for Oxygen Evolution in an Alkaline Solution

Mohamed A. Ghanem <sup>1,\*</sup>, Mabrook S. Amer <sup>1</sup>, Abdullah M. Al-Mayouf <sup>1</sup>, Prabhakarn Arunachalam <sup>1</sup> and Mark T. Weller <sup>2</sup>

- <sup>1</sup> Chemistry Department, College of Science, King Saud University, Riyadh 11451, Saudi Arabia; msamer@ksu.edu.sa (M.S.A.); amayouf@ksu.edu.sa (A.M.A.-M.); parunachalam@ksu.edu.sa (P.A.)  
<sup>2</sup> Chemistry Department, Cardiff University, Cardiff CF10 3AT, UK; wellerm1@cardiff.ac.uk  
 \* Correspondence: mghanem@ksu.edu.sa; Tel.: +966-011-4670405

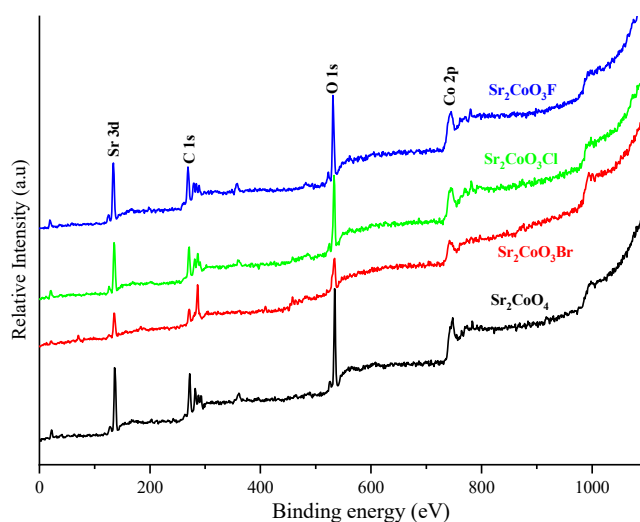

**Figure S1.** Comparative XPS survey spectra of  $\text{Sr}_2\text{CoO}_4$ ,  $\text{Sr}_2\text{CoO}_3\text{Br}$ ,  $\text{Sr}_2\text{CoO}_3\text{Cl}$ , and  $\text{Sr}_2\text{CoO}_3\text{F}$  catalysts.

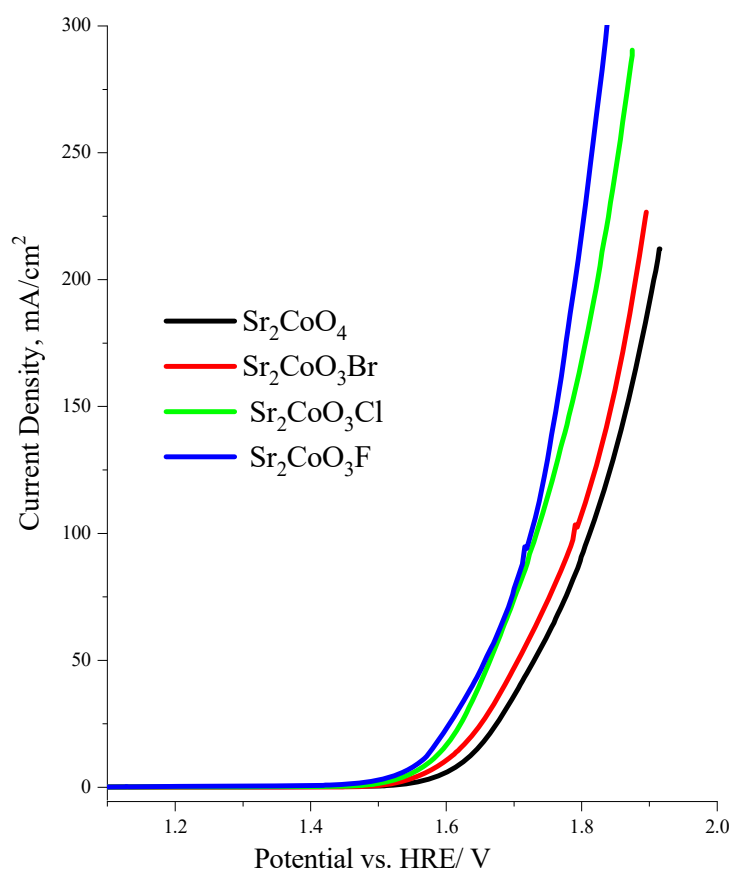

**Figure S2.** linear sweep voltammetry (LSV) of  $\text{Sr}_2\text{CoO}_4$ ,  $\text{Sr}_2\text{CoO}_3\text{Br}$ ,  $\text{Sr}_2\text{CoO}_3\text{Cl}$ , and  $\text{Sr}_2\text{CoO}_3\text{F}$  electrodes at rotation speed of 1600 rpm, in  $\text{N}_2$  deaerated 1.0 M NaOH at a scan rate of  $10 \text{ mV s}^{-1}$  and catalyst loading of  $0.8 \text{ mg/cm}^2$ .

**Table S1.** Electrochemical activity comparison of strontium cobalt oxyhalides catalysts activities of OER onset overpotential and the overpotential required to achieve  $10 \text{ mA/cm}^2$  current density ( $\eta_{10 \text{ mA/cm}^2}$ ) with the benchmarking catalysts that reported in the literature.

| Catalysts                                                                     | Electrolyte             | Onset overpotential (mV) | Overpotential at ( $10 \text{ mA cm}^{-2}$ ) | Ref.      |
|-------------------------------------------------------------------------------|-------------------------|--------------------------|----------------------------------------------|-----------|
| $\text{Sr}_3\text{Co}_2\text{O}_5 (\text{OH})_2 \cdot 2\text{H}_2\text{O}$    | 10 mM LiCl / 2.0 M LiOH | 390                      | 410                                          | [1]       |
| $\text{Sr}_2\text{Co}_{0.8}\text{Fe}_{0.2}\text{O}_3\text{Cl}$                | 1.0 M KOH               | 255                      | 300                                          | [2]       |
| $\text{Sr}_3\text{Co}_2\text{O}_5\text{Cl}_2$                                 | 1.0 M KOH               | 310                      | 360                                          | [3]       |
| $\text{NiFe}_2\text{F}_{4.4}\text{O}_{1.8}$                                   | 1.0 M KOH               | 240                      | 270                                          | [4]       |
| $\text{SrCo}_{0.8}\text{Fe}_{0.5-x}\text{O}_{3-\delta}/\text{Fe}_x\text{O}_y$ | 1.0 M KOH               | 290                      | 352                                          | [5]       |
| $\text{Sr}_4\text{Fe}_3\text{O}_8\text{Cl}_2$                                 | 1.0 M KOH               | 390                      | 465                                          | [6]       |
| Defected-Fe-F-nonporous oxide                                                 | 1.0 M KOH               | 160                      | 260                                          | [7]       |
| F-CoOOH/NF                                                                    | 1.0 M KOH               | NA                       | 270                                          | [8]       |
| Ni-Co-F-1,1                                                                   | 1.0 M KOH               | 280                      | 300                                          | [9]       |
| NiFeOF                                                                        | 1.0 M NaOH              | 270                      | 295                                          | [10]      |
| $\text{IrO}_2$                                                                | 1.0 M NaOH              | 320                      | --                                           | [11]      |
| $\text{Sr}_2\text{CoO}_3\text{F}$                                             | 1.0 M NaOH              | 270                      | 330                                          | This work |
| $\text{Sr}_2\text{CoO}_3\text{Cl}$                                            | 1.0 M NaOH              | 300                      | 370                                          | This work |
| $\text{Sr}_2\text{CoO}_3\text{Br}$                                            | 1.0 M NaOH              | 380                      | 420                                          | This work |

## References

- S1. Sonoki, H.; Daisuke M.; Sou T.; Yasuo T.; Osamu, Y.; Nobuyuki, I. A hydrated strontium cobalt oxyhydroxide Ruddlesden–Popper phase as an oxygen electrocatalyst for aqueous lithium–oxygen rechargeable batteries. *Chemical Communications*, **2019**, 55, 7454–7457.
- S2. Miyahara, Y.; Tomokazu F.; Takeshi A.; Kohei M. Dual-Site Catalysis of Fe-Incorporated Oxychlorides as Oxygen Evolution Electrocatalysts. *Chemistry of Materials*, **2020**, 32, 8195–8202.
- S3. Miyahara, Y.; Kohei M.; Tomokazu F.; Takeshi A. Strontium cobalt oxychlorides: enhanced electrocatalysts for oxygen reduction and evolution reactions. *Chemical Communications*, **2017**, 53, 2713–2716.
- S4. Lemoine, K.; Lhoste, J.; Hémon-Ribaud, A.; Heidary, N.; Maisonneuve, V.; Guiet, A.; Kornienko, N. Investigation of mixed-metal (oxy)fluorides as a new class of water oxidation electrocatalysts. *Chem. Sci.*, **2019**, 10, 9209–9218.
- S5. Yi, Y.; Qianbao, W.; Junshan, L.; Weitang, Y.; Chunhua C. Phase-Segregated  $\text{SrCo}_{0.8}\text{Fe}_{0.5-x}\text{O}_{3-\delta}/\text{Fe}_x\text{O}_y$  Heterostructured Catalyst Promotes Alkaline Oxygen Evolution Reaction. *ACS Appl. Mater. Interfaces* **2021**, 13, 15, 17439–17449.
- S6. Ghanem, M. A.; Arunachalam, P.; Almayouf, A.; Weller, M. T. Efficient bi-functional electrocatalysts of strontium iron oxy-halides for oxygen evolution and reduction reactions in alkaline media. *J. Electrochemical Society* 163, no. 6 (2016): H450.
- S7. Fan, X., Yuanyue, L.; Chen, S.; Shi, J.; Wang, J.; Fan, A.; Zan, W.; Li, Sidian; Goddard, W. A.; Zhang, X.-M. Defect-enriched iron fluoride-oxide nanoporous thin films bifunctional catalyst for water splitting. *Nature communications*, **2018**, 9, 1–11.
- S8. Chen, P.; Zhou, T.; Wang, S.; Zhang, N.; Tong, Y.; Ju, H.; Chu, W.; Wu, C.; Xie, Yi. Dynamic Migration of Surface Fluorine Anions on Cobalt-Based Materials to Achieve Enhanced Oxygen Evolution Catalysis. *Angewandte Chemie International Edition*, **2018**, 57, 15471–15475.
- S9. Xue, Y.; Wang, Y.; Liu, H.; Yu, X.; Xue, H.; Feng, L. Electrochemical oxygen evolution reaction catalyzed by a novel nickel–cobalt-fluoride catalyst. *Chemical Communications*, **2018**, 54, 6204–6207.
- S10. Liang, K.; Guo, L.; Marcus, K.; Zhang, S.; Yang, Z.; Perea, Daniel E.; Zhou, L.; Du, Y.; Yang Y. Overall Water Splitting with Room-Temperature Synthesized NiFe Oxyfluoride Nanoporous Films. *ACS Catal.*, **2017**, 7, 12, 8406–8412.
- S11. Charles, C. L.; McCrory, S. J.; Peters, J. C.; Jaramillo; T. F. Benchmarking Heterogeneous Electrocatalysts for the Oxygen Evolution Reaction. *J. Am. Chem. Soc.* **2013**, 135, 16977–16987.
